# Supplementary material
Source: publisher figshare collection journal article supplement (https://acs.figshare.com/ndownloader/files/3943822)
Supplement: Supplementary file 1 [file 3943822]

**Supporting information**

# Facile Fabrication of Redox-responsive Thiol-containing Drug Delivery System via RAFT Polymerization

Yuanyuan Zhuang,<sup>†</sup> Yue Su,<sup>†,\*</sup> Yu Peng,<sup>‡</sup> Dali Wang,<sup>†</sup> Hongping Deng,<sup>†</sup> Xiaodong Xi,<sup>‡</sup>  
Xinyuan Zhu<sup>†,\*</sup>, Yunfeng Lu<sup>†,§</sup>

<sup>†</sup> *School of Chemistry and Chemical Engineering, State Key Laboratory of Metal Matrix Composites, Shanghai Jiao Tong University, 800 Dongchuan Road, Shanghai 200240, People's Republic of China*

<sup>‡</sup> *Shanghai Institute of Hematology, Ruijin Hospital, Shanghai Jiao Tong University School of Medicine, Shanghai 200025, People's Republic of China*

<sup>§</sup> *Department of Chemical and Biomolecular Engineering, University of California, Los Angeles, California 90095, United States*

\* Corresponding author. E-mail: yuesu2005@yahoo.com.cn; xyzhu@sjtu.edu.cn.  
Telephone: +86-21-34203400. Fax: +86-21-54741297.

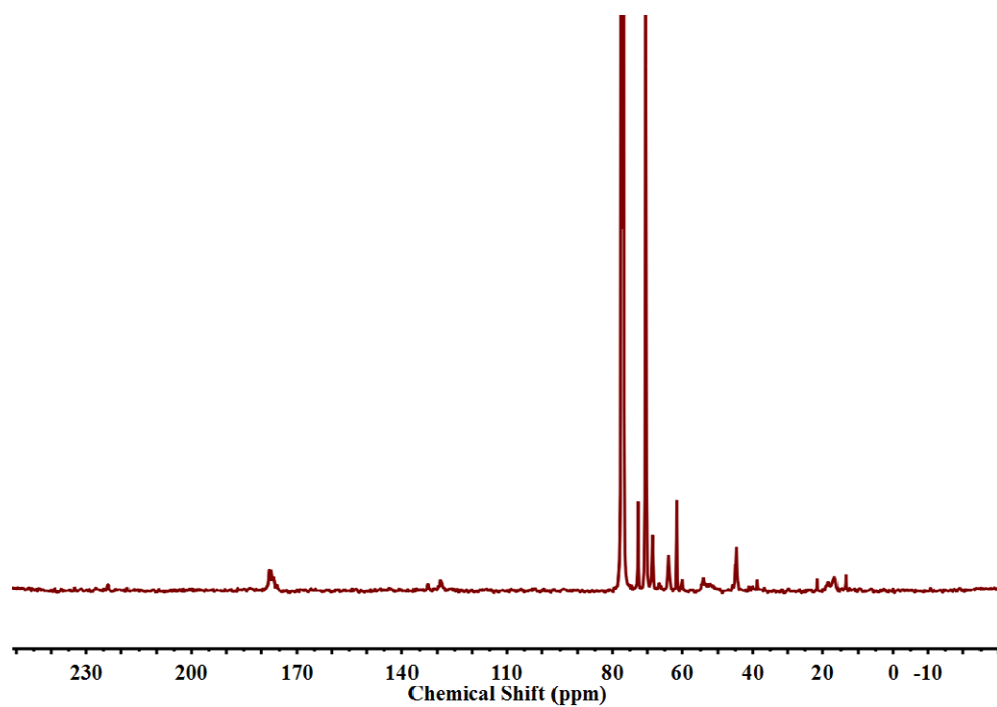

**Figure S1.** Quantitative  $^{13}\text{C}$ -NMR spectrum of poly(VBPT-*co*-PEGMA) in  $\text{CDCl}_3$ .

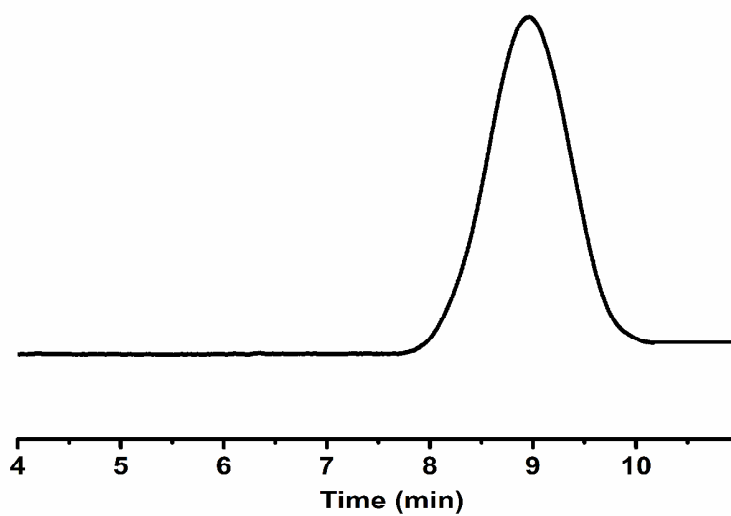

**Figure S2.** GPC profile of poly(VBPT-*co*-PEGMA).

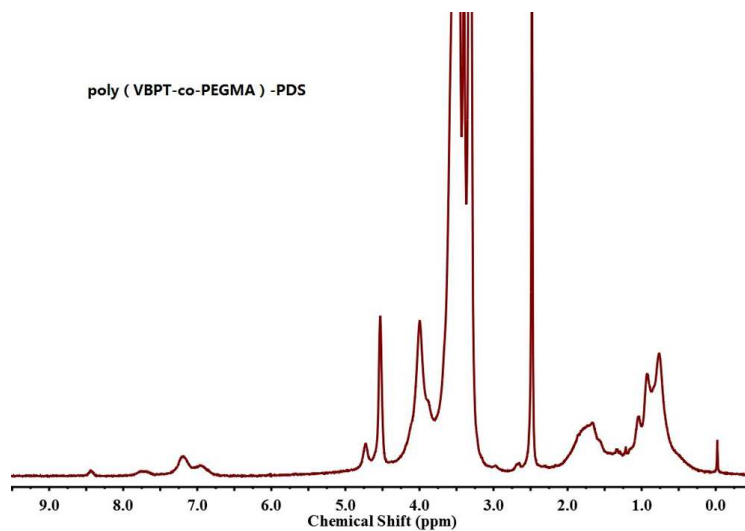

**Figure S3.**  $^1\text{H-NMR}$  spectra of poly(VBPT-*co*-PEGMA)-PDS in  $\text{DMSO-}d_6$ .

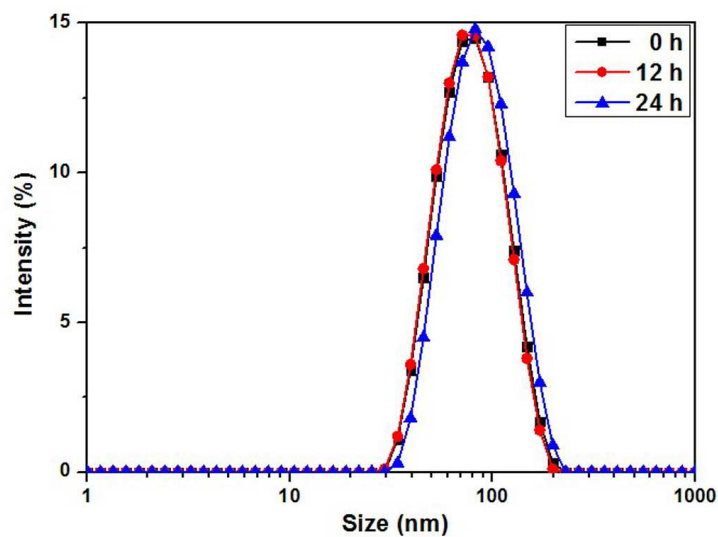

**Figure S4.** DLS plots of poly(VBPT-*co*-PEGMA)-S-S-MP micelles without GSH treatment in PBS (pH 7.4, 50 mM) at 37 °C over time.

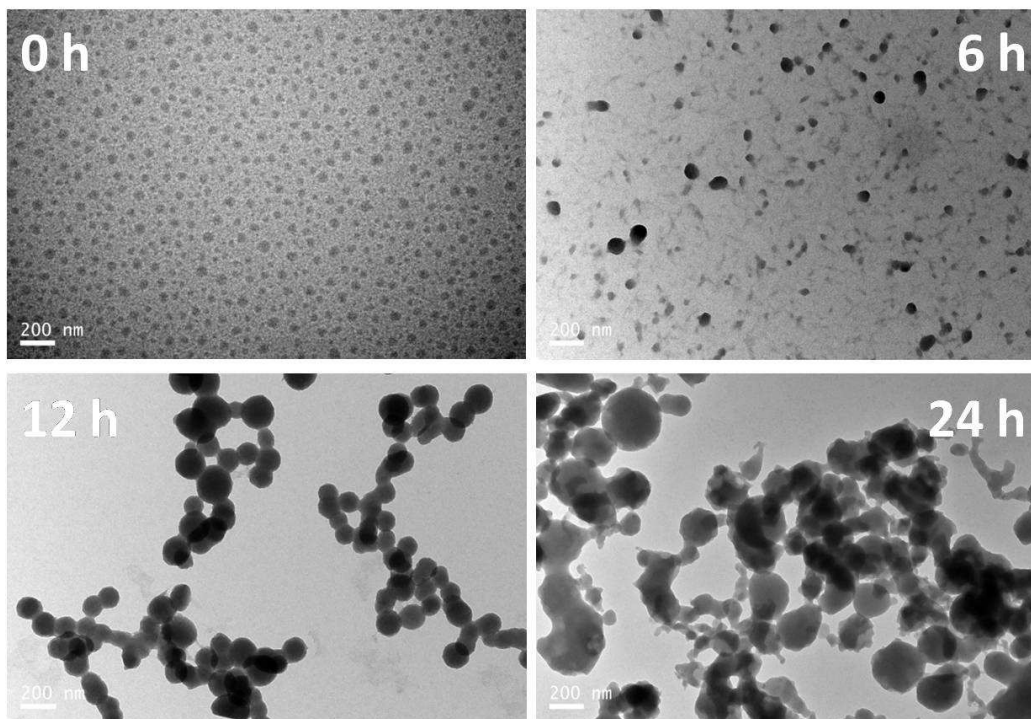

**Figure S5.** TEM images of poly(VBPT-*co*-PEGMA)-S-S-MP micelles with 10 mM GSH in PBS (50 mM, pH=7.4) at 37 °C over time.

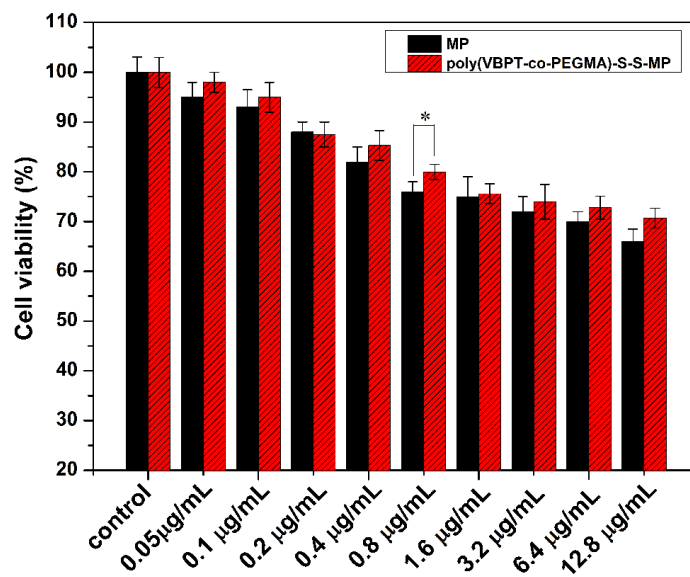

**Figure S6.** Cell viability of NIH/3T3 cells against poly(VBPT-*co*-PEGMA)-S-S-MP micelles and free MP after incubation for 72 h with different MP concentrations. Data are presented as the average  $\pm$  standard deviation ( $n = 6$ ).  $0.01 < p \leq 0.05$  and  $p \leq 0.01$  are considered to be statistically significant and highly significant and are denoted as “\*” and “\*\*\*”, respectively.
